# Supplementary material for: An ultrasmall PVP–Fe–Cu–Ni–S nano-agent for synergistic cancer therapy through triggering ferroptosis and autophagy
Source: Royal Society of Chemistry journal article supplement (doi:10.1039/d3nr02708b), 2023-01-01
Supplement: d3nr02708b1.pdf [file d3nr02708b1.pdf]

## Electronic Supplementary Information for

### An Ultrasmall PVP-Fe-Cu-Ni-S Nano-agent for Synergistic Cancer Therapy through triggering Ferroptosis and Autophagy

Rongjun Zhang,<sup>a, #</sup> Shuxiang Xu,<sup>b, c, #</sup> Miaomiao Yuan,<sup>d, e, #, \*</sup> Lihao Guo,<sup>d</sup> Luoyijun Xie,<sup>e</sup> Yingying Liao,<sup>e</sup> Yang Xu,<sup>b, c, \*</sup> and Xuemei Fu<sup>e, f, \*</sup>

<sup>a</sup>. Institute of Molecular Medicine (IMM), Renji Hospital, State Key Laboratory of Oncogenes and Related Genes, Shanghai Jiao Tong University School of Medicine, Shanghai 200240, China.

<sup>b</sup>. Department of Cardiology, Cardiovascular Key Lab of Zhejiang Province, The Second Affiliated Hospital, Zhejiang University School of Medicine, Zhejiang University, Hangzhou, Zhejiang 310009, China. E-mail: xuyang2020@zju.edu.cn.

<sup>c</sup>. Binjiang Research Institute of Zhejiang University, Hangzhou, Zhejiang 310052, China.

<sup>d</sup>. Precision Research Center for Refractory Diseases in Shanghai General Hospital, Shanghai Jiao Tong University School of Medicine, Shanghai 200025, China. E-mail: miaomiaoyuan2023@shsmu.edu.cn.

<sup>e</sup>. The Eighth Affiliated Hospital, Sun Yat-sen University; Shenzhen, Guangdong 518033, China.

<sup>f</sup>. International Peace Maternity and Child Health Hospital of China Welfare Institution, School of Medicine, Shanghai Jiao Tong University, Shanghai 200030, China. E-mail: fxmzj2004@163.com

\*To whom correspondence should be addressed. miaomiaoyuan2023@shsmu.edu.cn; xuyang2020@zju.edu.cn; fxmzj2004@163.com.

## 1. TEM-EDS mapping of NPs

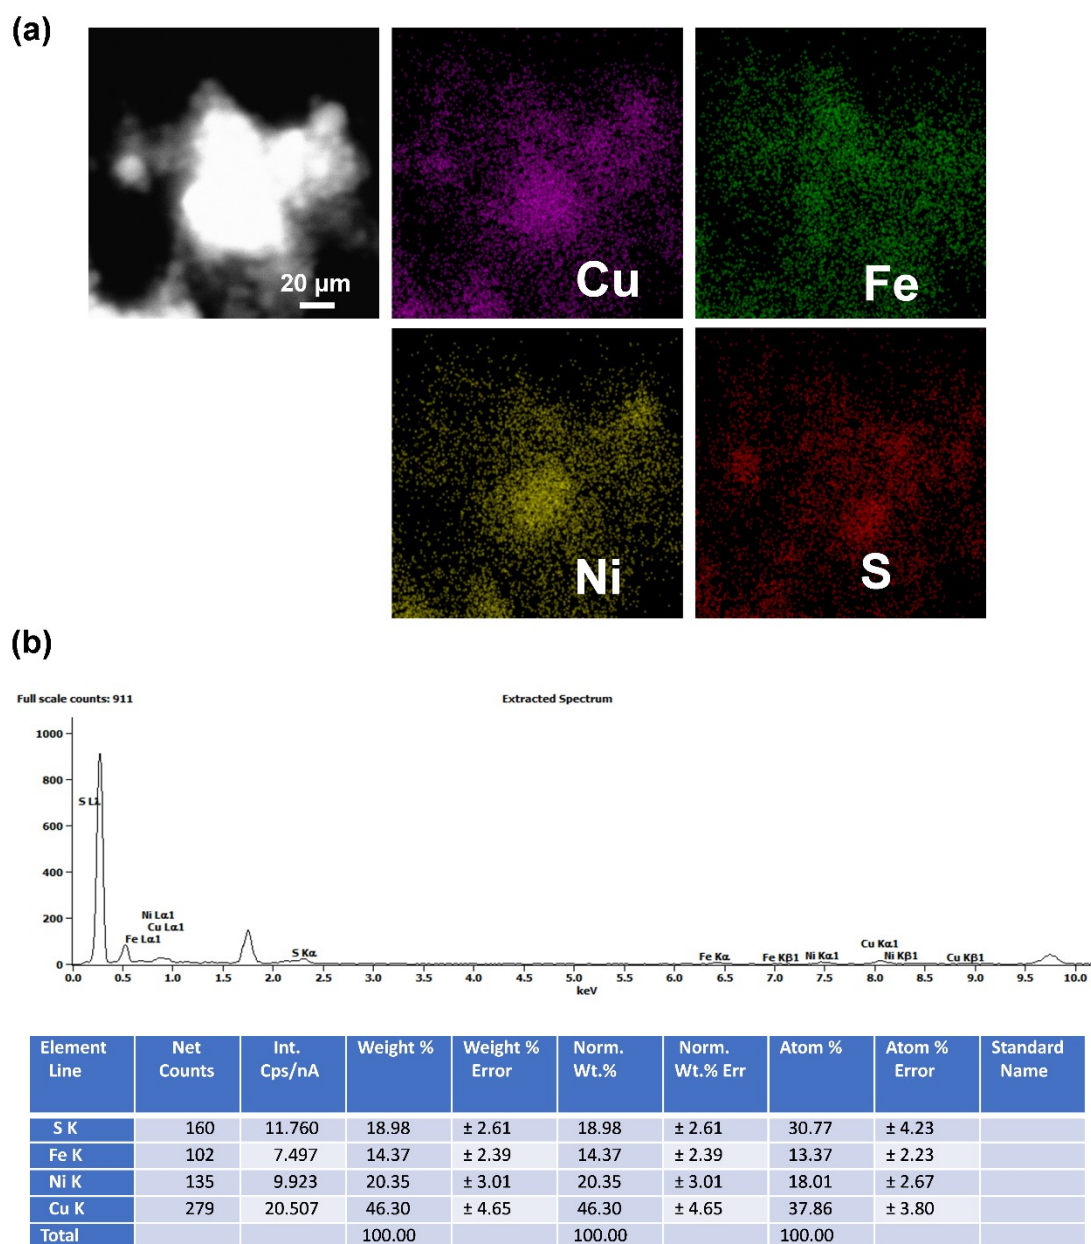

**Fig. S1.** (a) TEM-EDS mapping and (b) compositional analysis of NPs.

## 2. Synthesis process of NPs and PVP NPs.

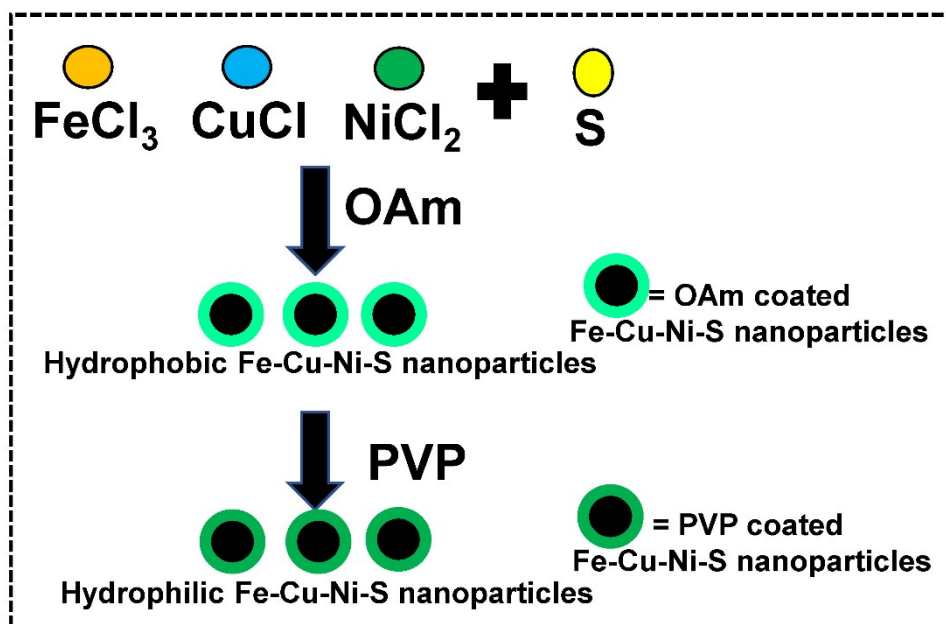

**Fig. S2.** A scheme of the synthesis process of NPs and PVP NPs.

### 3. The water solubility of PVP-NPs.

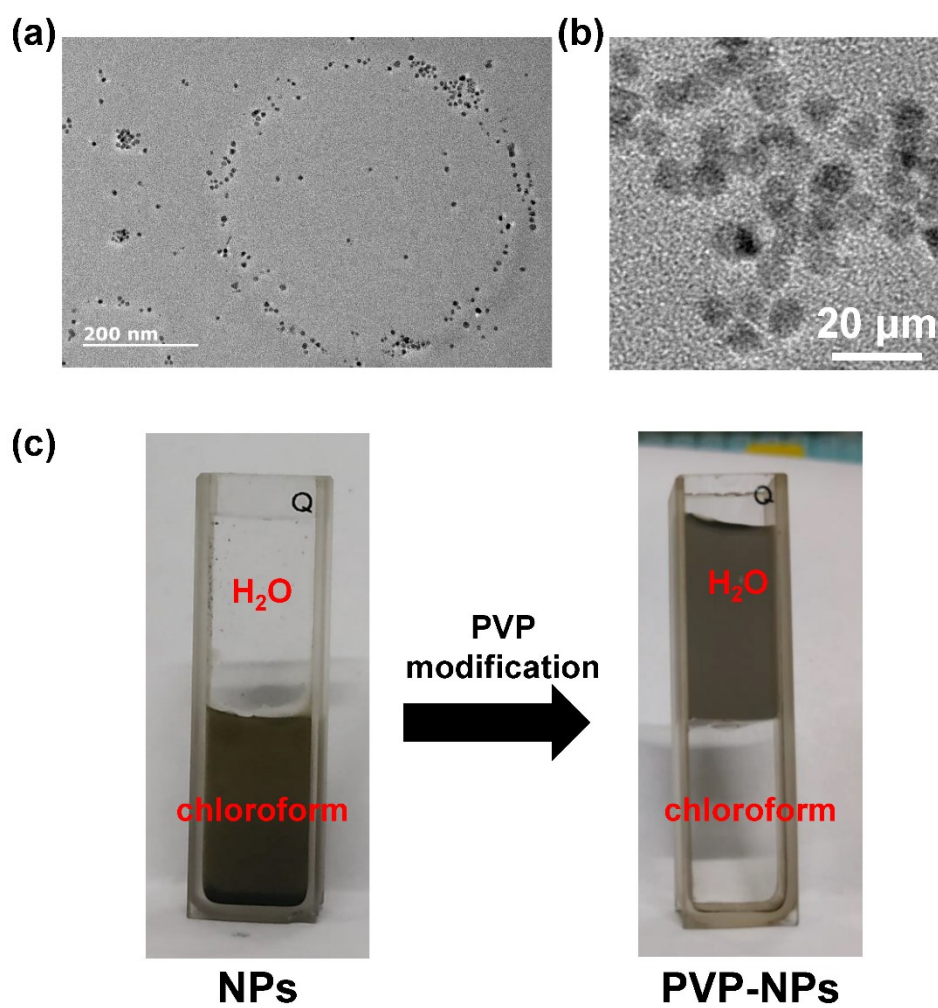

**Fig. S3.** (a, b) TEM of PVP-NPs. (c) Photograph of NPs dispersed in chloroform (left) and in pure water (right) before and after PVP modification.

#### 4. Zeta potential analysis of NPs and PVP-NPs.

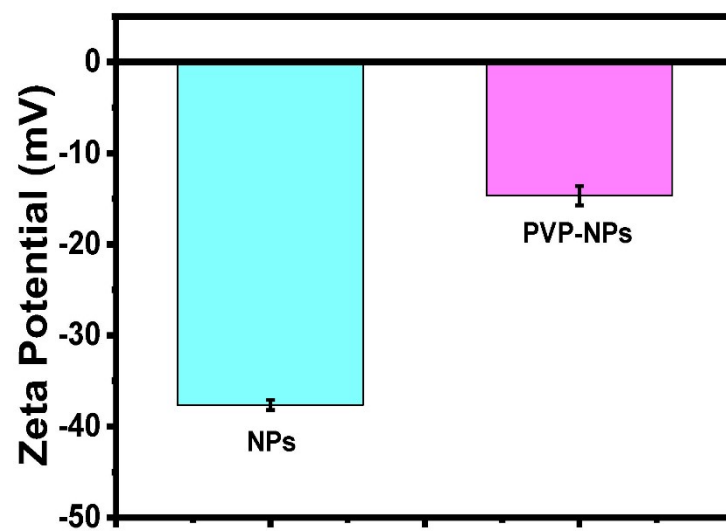

Fig. S4. Zeta potential analysis of NPs and PVP-NPs.

## 5. Photothermal ability of NPs.

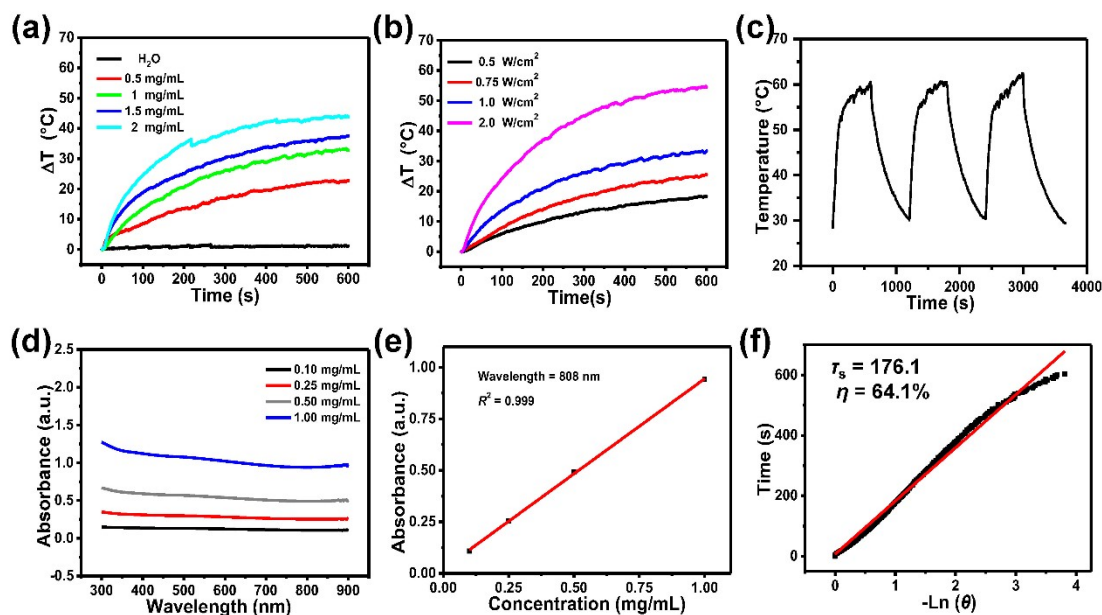

**Fig. S5.** Photothermal ability of NPs. (a) The relationship of the photothermal conversion with different concentrations of NPs under NIR irradiation (1 W/cm<sup>2</sup>) for 10 min. (b) The relationship of photothermal conversion and the different power densities (0.5-2 W/cm<sup>2</sup>) of NPs (1 mg/mL). (c) Temperature variations of NPs (1 mg/mL) over 3 heating-cooling cycles under NIR irradiation. (d) UV-vis-NIR absorbance spectrum with different concentrations of NPs. (e) The relationship of absorbance and different concentrations of NPs. (f) The relationship between the first cooling time and negative natural logarithm of the temperature driving force calculated from (c). The  $\eta$  of PVP-NPs was estimated to be  $\sim 64.1\%$ .

## 6. Chemo-Dynamic ability of PVP-NPs.

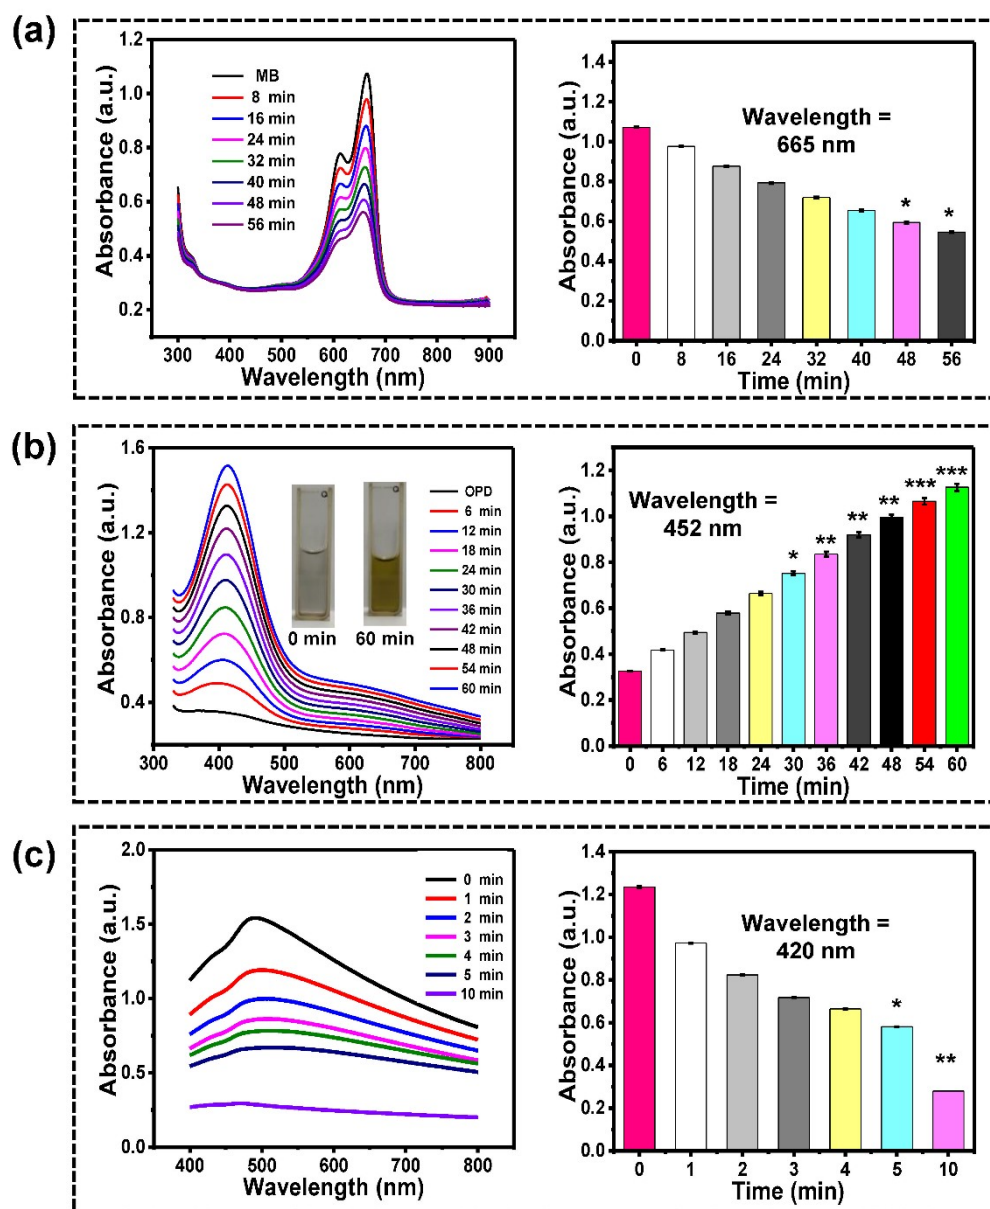

**Fig. S6.** Chemo-Dynamic ability of PVP-NPs. (a) The degradation of MB with PVP-NPs (0.1 mg/mL) in different treatment time. (b) The degradation of OPD with PVP-NPs (0.1 mg/mL) in different treatment time. (c) Extracellular singlet oxygen ( $^1O_2$ ) generation of PVP-NPs (0.1 mg/mL) with different NIR treatment. Data are presented as mean value  $\pm$  SD. \* $p < 0.05$ , \*\* $p < 0.01$ , \*\*\* $p < 0.001$ .

## 7. Electron paramagnetic resonance analysis of PVP-NPs.

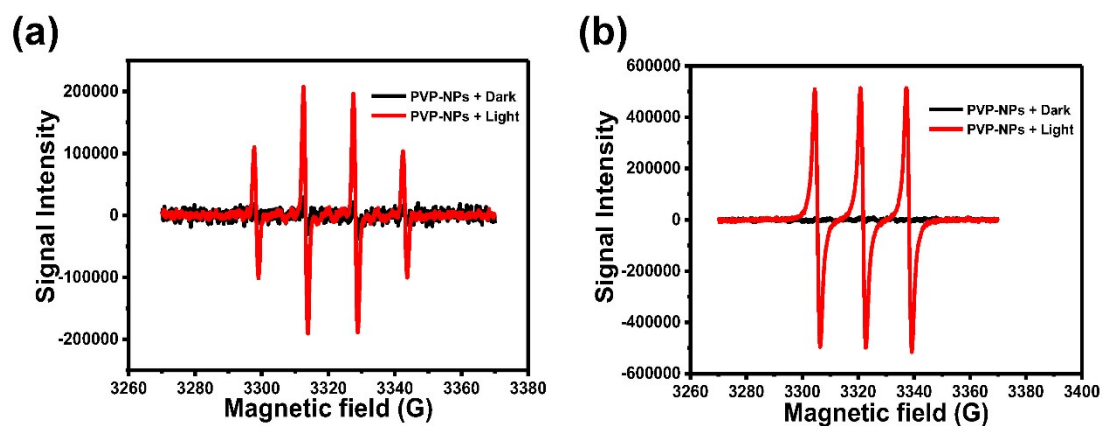

**Fig. S7.** (a) Electron paramagnetic resonance spectra of PVP-NPs after white light irradiation or not in the presence of DMPO. (b) Electron paramagnetic resonance spectra of PVP-NPs after white light irradiation or not in the presence of TEMP.

## 8. Synthesis process of NPs and PVP NPs.

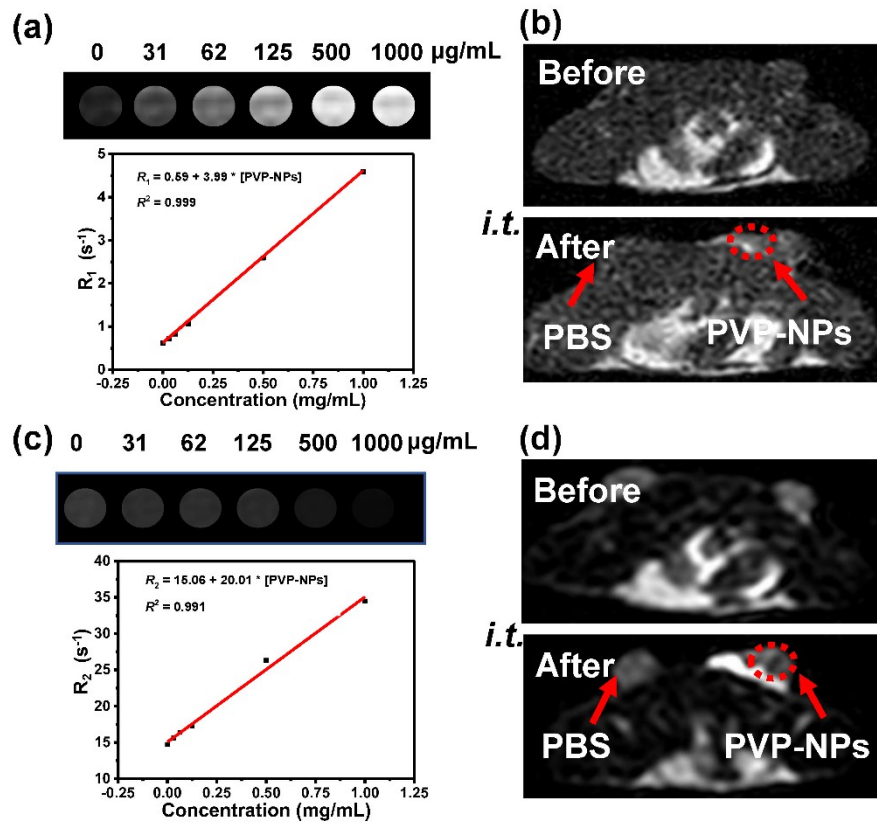

**Fig. S8.** MRI signal detection of PVP-NPs. (a) The relationship of T1-weighted MRI signal and concentration of PVP-NPs *in vitro*. (b) T1-weighted MRI signal intensity of mice collected pre- and post-intratumorally injected of PBS and 2 mg/kg of PVP-NPs. (c) The relationship of T2-weighted MRI signal and concentration of PVP-NPs *in vitro*. (d) T2-weighted MRI signal intensity of mice collected pre- and post-intratumorally injected of PBS and 2 mg/kg of PVP-NPs.

9. Pearson's correlation analysis of Fig. 3.

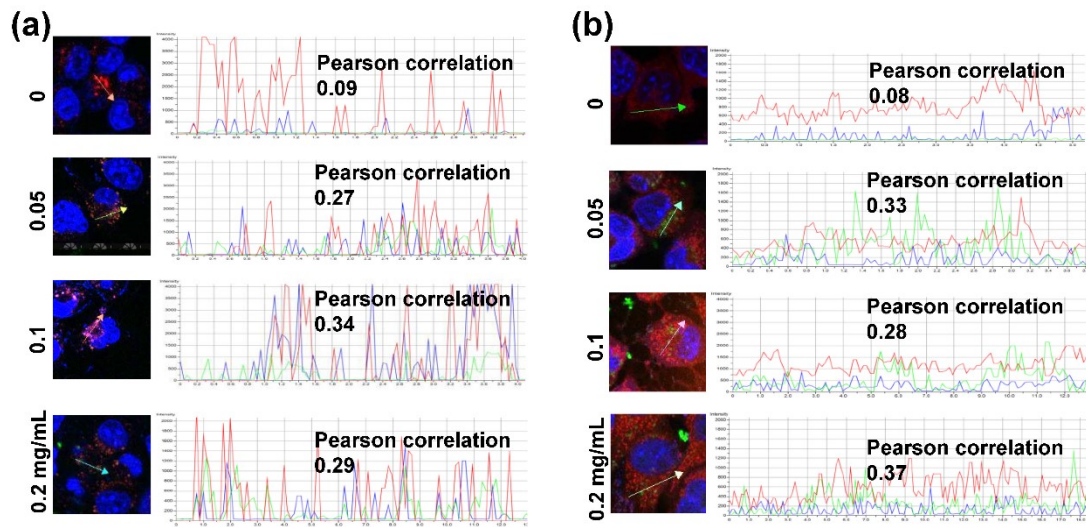

Fig. S9. (a) Pearson's correlation of Fig. 3c. (b) Pearson's correlation of Fig. 3d.

#### 10. Cloning formation ability of PVP-NPs.

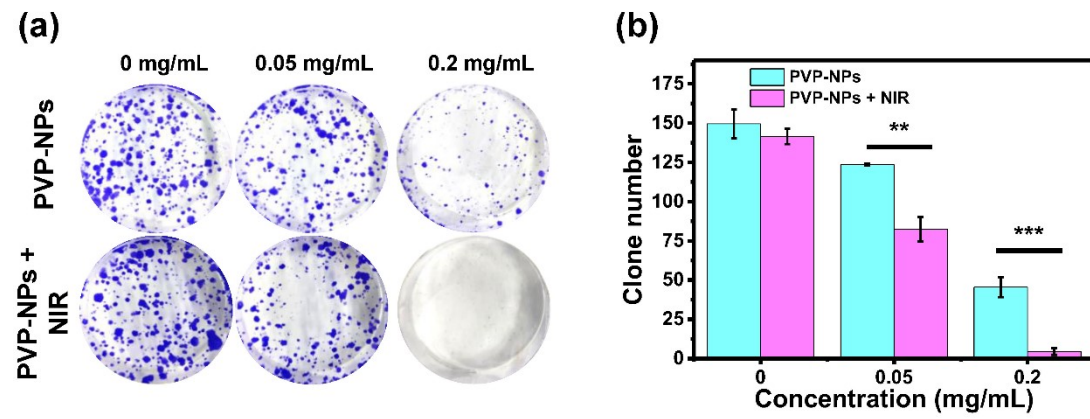

**Fig. S10.** (a, b) The photo and statistical analysis of cloning formation ability of PVP-NPs with NIR treatment. Data are presented as mean value  $\pm$  SD. \* $p < 0.05$ , \*\* $p < 0.01$ , \*\*\* $p < 0.001$ .

# 11. Gating strategies for the flow cytometry experiment.

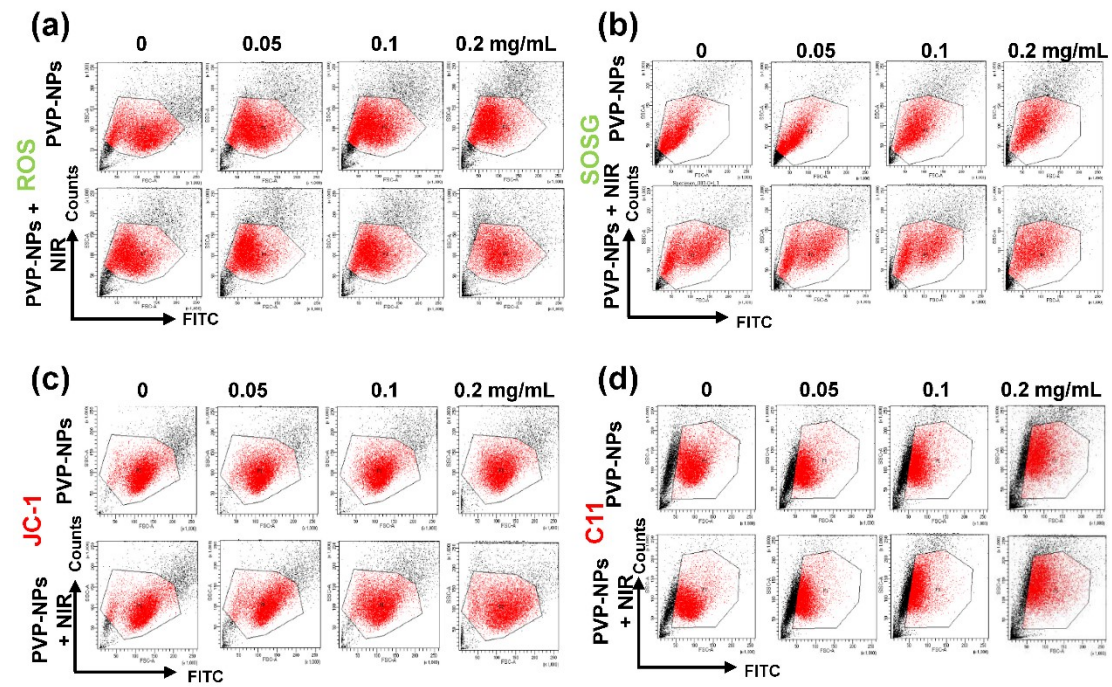

**Fig. S11.** (a) Gating strategies for the flow cytometry experiment of ROS assay. (b) Gating strategies for the flow cytometry experiment of SOSG assay. (c) Gating strategies for the flow cytometry experiment of JC-1 assay. (d) Gating strategies for the flow cytometry experiment of membrane lipid peroxidation assay.

12. Pearson's correlation of Fig. 5.

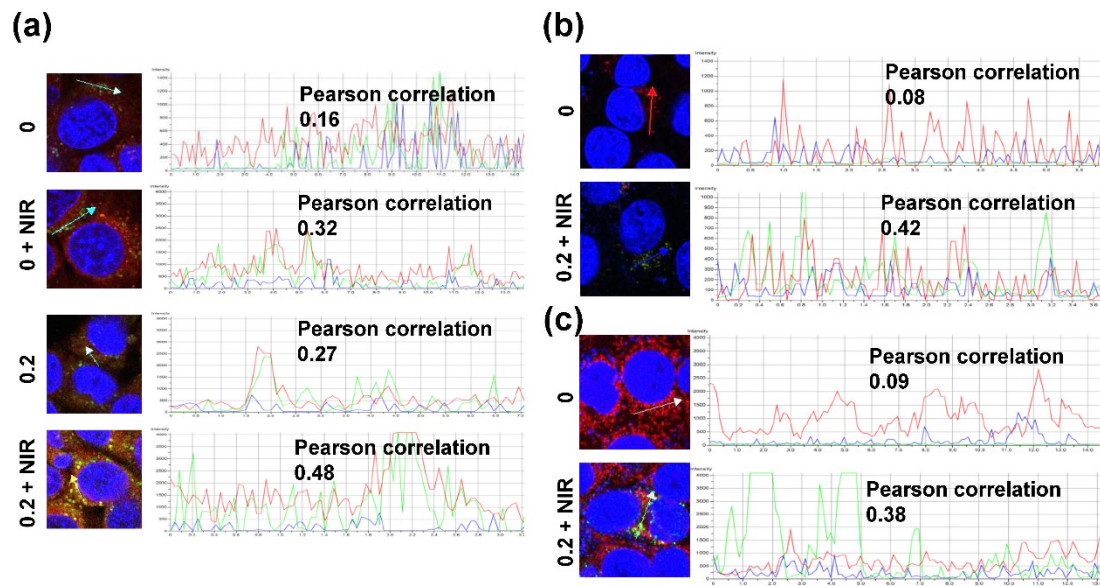

Fig. S12. (a) Pearson's correlation of Fig. 5e. (b) Pearson's correlation of Fig. 5f. (c) Pearson's correlation of Fig. 5g.

13. Representative images and tumor weight after different time.

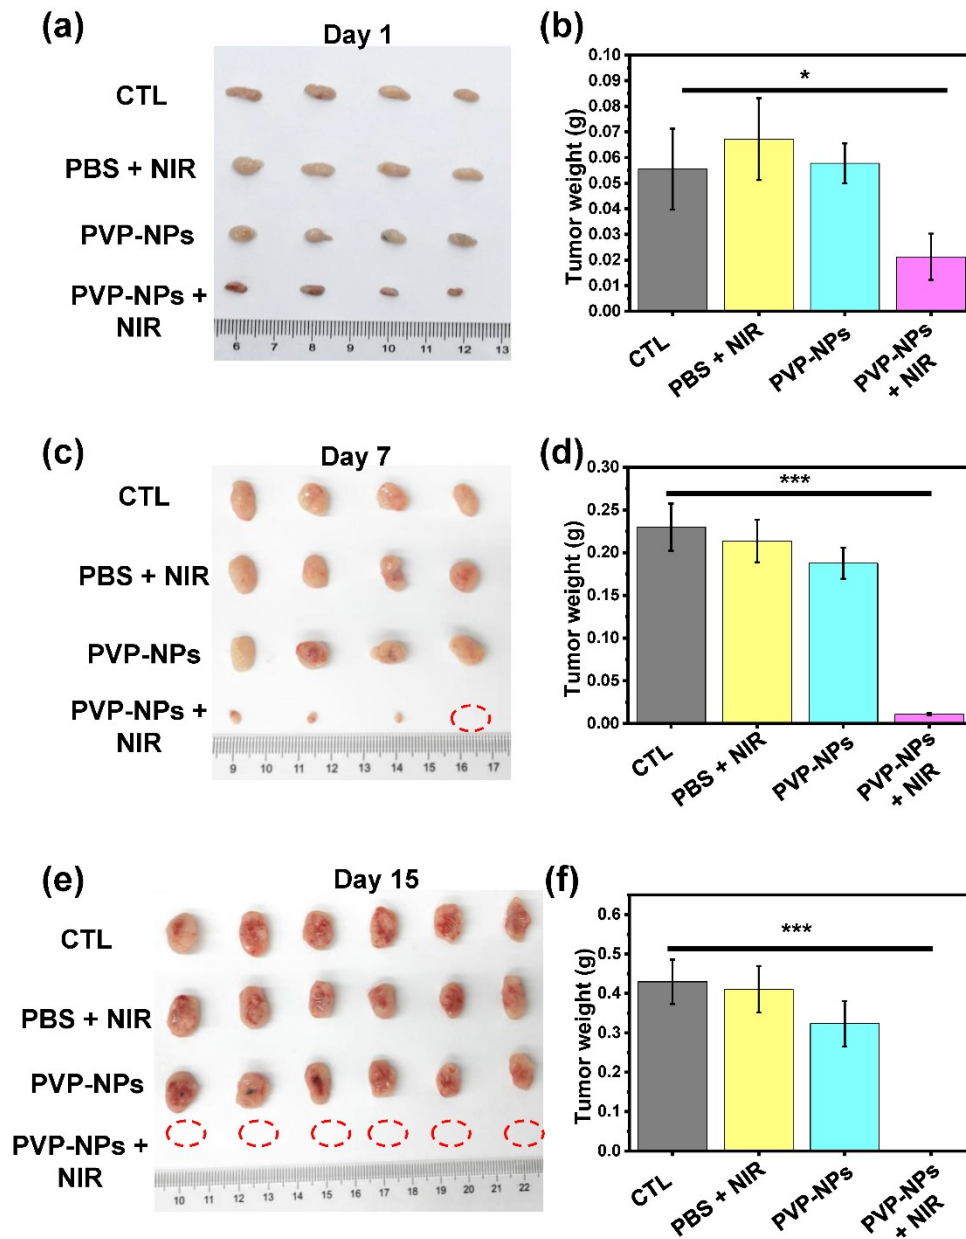

**Fig. S13.** (a, b) Representative images and tumor weight of harvested 4T1 tumors after different treatments in day 1. (c, d) Representative images and tumor weight of harvested 4T1 tumors after different treatments in day 7. (e, f) Representative images and tumor weight of harvested 4T1 tumors after different treatments in day 15. Data are presented as mean value  $\pm$  SD. \* $p < 0.05$ , \*\* $p < 0.01$ , \*\*\* $p < 0.001$ .

**14. Toxicity assessment of PVP-NPs.**

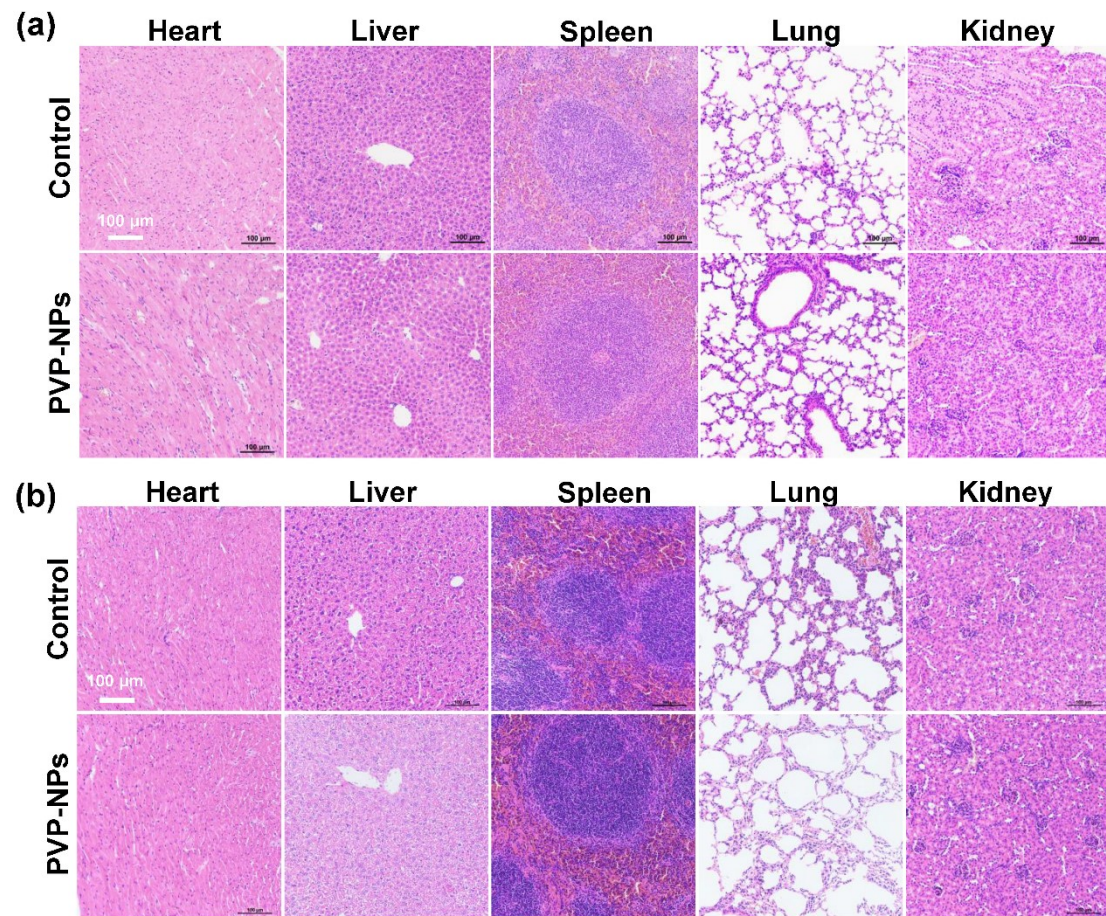

**Fig. S14.** Toxicity assessment of PVP-NPs. (a, b) H&E images of the major organs (Heart, Liver, Spleen, Lung, and Kidney) of mice received different treatments in day 7 and 30 after intravenous injection of PVP-NPs (200  $\mu$ L, 2 mg/mL).
